# Supplementary material
Source: publisher site journal article supplement (https://www.dovepress.com/article/469638)
Supplement: Supplementary file 1 [file get_supplementary_file.php]

Supplementary Table 1. General characteristics of NHANES participants from 2007-2016 stratified by all-cause mortality status.

|  | Alive | Deceased | P-value |
| --- | --- | --- | --- |
| Age | 47.966±0.116 | 62.417±0.368 | <0.001 |
| Age, years |  |  | <0.001 |
| 26-64 | 18195 (86.09%) | 915 (49.59%) |  |
| ≥65 | 3791 (13.91%) | 1240 (50.41%) |  |
| Gender |  |  | <0.001 |
| Male | 10468 (47.79%) | 1265 (56.95%) |  |
| Female | 11518 (52.21%) | 890 (43.05%) |  |
| Race |  |  | <0.001 |
| Mexican American | 3604 (8.66%) | 221 (4.65%) |  |
| Other Hispanic | 2550 (5.83%) | 167 (2.88%) |  |
| Non-Hispanic White | 8521 (66.44%) | 1097 (73.87%) |  |
| Non-Hispanic Black | 4658 (11.12%) | 559 (13.47%) |  |
| Other Race | 2653 (7.96%) | 111 (5.14%) |  |
| Education |  |  | <0.001 |
| Less Than 9th Grade | 2427 (5.61%) | 350 (10.09%) |  |
| 9-11th Grade | 3093 (10.43%) | 465 (17.67%) |  |
| High school graduate | 4807 (21.28%) | 530 (25.73%) |  |
| College or AA degree | 6129 (30.14%) | 522 (28.79%) |  |
| College graduate or above | 5511 (32.48%) | 283 (17.61%) |  |
| Health insurance |  |  |  |
| Yes | 16895 (82.16%) | 1895 (88.04%) |  |
| No | 5091 (17.84%) | 260 (11.96%) |  |
| PIR |  |  | <0.001 |
| <1.3 | 6190 (18.15%) | 863 (29.92%) |  |
| 1.3-3.5 | 7144 (31.2%) | 774 (38.2%) |  |
| ≥3.5 | 6602 (43.46%) | 335 (24.15%) |  |
| Work intensity |  |  | <0.001 |
| low | 11491 (46.4%) | 1840 (80.34%) |  |
| medium | 10233 (52.31%) | 305 (19.1%) |  |
| high | 246 (1.22%) | 9 (0.53%) |  |
| BMI kg/m2 |  |  | 0.003 |
| ≤24.9 | 5821 (27.33%) | 617 (27.71%) |  |
| 25-29.9 | 7095 (33.02%) | 614 (27.87%) |  |
| ≥30 | 8397 (36.88%) | 826 (40.06%) |  |
| Smoke status |  |  | <0.001 |
| Never | 12302 (55.3%) | 744 (33.81%) |  |
| Former | 5065 (24.58%) | 799 (36.36%) |  |
| Current | 4602 (20.06%) | 610 (29.78%) |  |
| alcohol use |  |  | 0.025 |
| Nver | 4922 (18.12%) | 457 (19.79%) |  |
| Former | 2609 (10.07%) | 294 (12.10%) |  |
| Current | 13782 (69.04%) | 1306 (63.75%) |  |
| Sedentary behavior, hours |  |  | <0.001 |
| <6 | 9299 (37.6%) | 774 (32.45%) |  |
| 6-9 | 8975 (42.27%) | 972 (45.3%) |  |
| ≥10 | 3605 (19.76%) | 389 (21.2%) |  |
| Physical activity |  |  | <0.001 |
| Vigorous | 6950 (35.96%) | 324 (17.85%) |  |
| Moderately | 3639 (18.22%) | 254 (11.77%) |  |
| Inactive | 11375 (45.71%) | 1573 (70.12%) |  |
| Marital status |  |  | <0.001 |
| Single | 7724 (30.82%) | 1057 (44.21%) |  |
| Non-single | 14247 (69.13%) | 1096 (55.73%) |  |
| Depression |  |  | <0.001 |
| None | 14438 (68.62%) | 1204 (56.19%) |  |
| Mild | 2921 (12.89%) | 362 (17.88%) |  |
| Moderate | 1049 (4.26%) | 154 (6.27%) |  |
| Severe | 710 (2.69%) | 107 (4.98%) |  |
| Stroke |  |  | <0.001 |
| No | 21392 (97.88%) | 1873 (89.22%) |  |
| Yes | 570 (2.02%) | 276 (10.58%) |  |
| DM |  |  | <0.001 |
| No | 18744 (88.52%) | 1412 (70.24%) |  |
| Yes | 2819 (9.58%) | 701 (27.93%) |  |
| Hypertension |  |  | <0.001 |
| No | 14380 (68.6%) | 760 (39.62%) |  |
| Yes | 7606 (31.4%) | 1395 (60.38%) |  |
| CVD |  |  | <0.001 |
| No | 20637 (94.87%) | 1597 (76.5%) |  |
| Yes | 1344 (5.12%) | 557 (23.47%) |  |
| Sleep duration, hours |  |  | <0.001 |
| <7 | 8200 (33.62%) | 862 (39.64%) |  |
| 7-8 | 11427 (55.86%) | 991 (47.27%) |  |
| ≥9 | 2359 (10.51%) | 302 (13.10%) |  |

Continuous variables were presented as weighted mean ± standard deviation. Categorical variables are expressed as counts (percentages). The percentages and p-values were weighted.

PIR, ratio of family income to poverty; BMI, body mass index; CVD, cardiovascular disease

Supplementary Table 2. Association between sleep duration and all-cause mortality in NHANES 2007-2016 stratified by age, gender, and race

|  | Sleep duration | | |
| --- | --- | --- | --- |
|  | Short HR 95% CI, P | Optimal | Long HR 95% CI, P |
| Age, years |  |  |  |
| 26-64 | 1.313 (1.075-1.604), 0.008 | Ref. | 1.418 (1.05-1.915), 0.023 |
| ≥65 | 0.98 (0.828-1.159), 0.811 | Ref. | 1.18 (0.957-1.456), 0.121 |
| Gender |  |  |  |
| Male | 1.273 (1.068-1.519), 0.007 | Ref. | 1.491 (1.174-1.894), 0.001 |
| Female | 1.039 (0.865-1.248), 0.684 | Ref. | 1.055 (0.82-1.357), 0.676 |
| Race |  |  |  |
| Mexican American | 1.252 (0.87-1.801), 0.227 | Ref. | 1.66 (1.103-2.499), 0.015 |
| Other Hispanic | 0.868 (0.589-1.28), 0.476 | Ref. | 1.09 (0.614-1.935), 0.77 |
| Non-Hispanic White | 1.276 (1.083-1.501), 0.004 | Ref. | 1.275(1.021-1.591), 0.032 |
| Non-Hispanic Black | 0.83 (0.677-1.018), 0.073 | Ref. | 1.125 (0.813-1.558), 0.477 |
| Other Race | 0.877 (0.496-1.554),0.654 | Ref. | 1.324 (0.691-2.537), 0.39ra8 |
| **Sensitivity analysis after excluding participants from 2015-2016 (n=19,391)** | | | |
| Age, years |  |  |  |
| 26-64 | 1.306 (1.06-1.607) 0.012 | Ref. | 1.532 (1.087-2.16) 0.015 |
| ≥65 | 0.972 (0.822-1.149) 0.74 | Ref. | 1.177 (0.937-1.478) 0.162 |
| Gender |  |  |  |
| Male | 1.279 (1.067-1.532) 0.008 | Ref. | 1.499 (1.145-1.961) 0.003 |
| Female | 1.025 (0.849-1.236) 0.799 | Ref. | 1.114 (0.848-1.463) 0.44 |
| Race |  |  |  |
| Mexican American | 1.281 (0.871-1.882) 0.208 | Ref. | 1.795 (1.097-2.936) 0.02 |
| Other Hispanic | 0.809 (0.537-1.217) 0.309 | Ref. | 1.19 (0.592-2.394) 0.625 |
| Non-Hispanic White | 1.26 (1.067-1.488) 0.006 | Ref. | 1.337 (1.051-1.699) 0.018 |
| Non-Hispanic Black | 0.825 (0.669-1.018) 0.074 | Ref. | 1.113 (0.768-1.615) 0.571 |
| Other Race | 0.824 (0.471-1.441) 0.498 | Ref. | 1.248 (0.548-2.846) 0.598 |

The model was adjusted for sex, age, and race, education, health insurance, BMI, smoking status, alcohol use, work intensity, sedentary behavior, physical activity, marital status, depression, PIR, stroke, diabetes, hypertension, and CVD.
